# Supplementary material
Source: PubMed Central journal article supplement (PMC7082840)
Supplement: NIHMS1529438-supplement-1.pdf [file NIHMS1529438-supplement-1.pdf]

# Figure S1

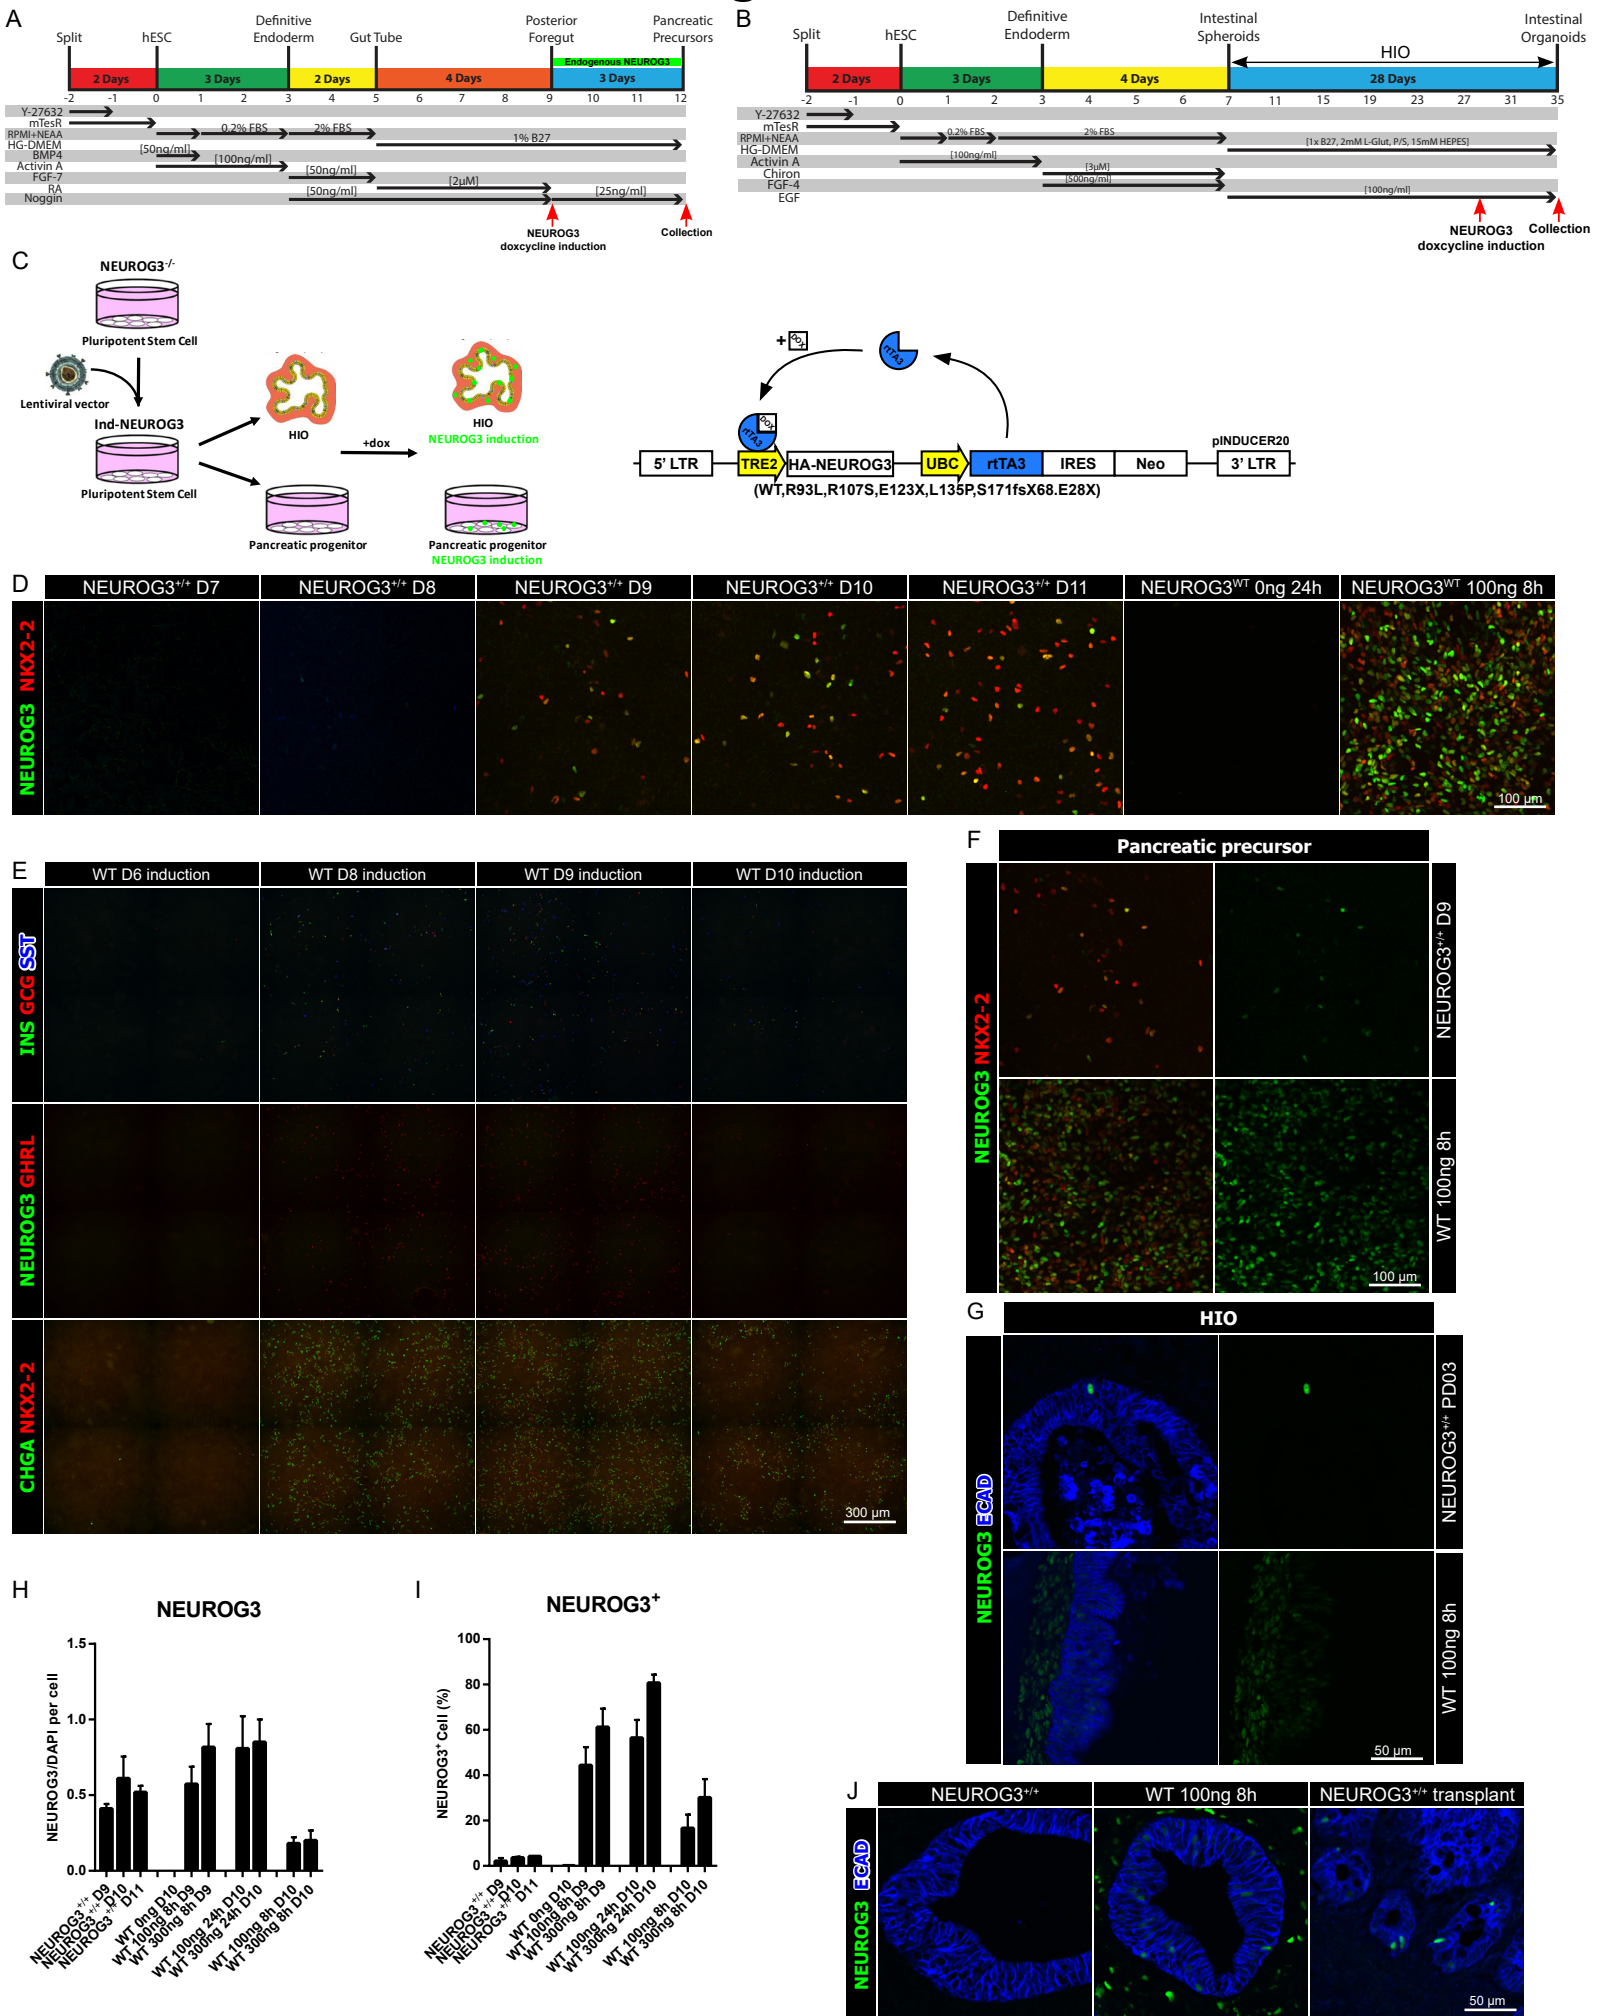

**Figure S1:** Tetracycline inducible NEUROG3 system characterization in pancreatic precursors and HIOs derived from hESCs. Related to Figure 1.

**(A)** Protocol for pancreatic precursors derived from hESCs. Endogenous NEUROG3 expression starts from D9 throughout D12. To simulate endogenous NEUROG3 expression, NEUROG3 was induced on D9 and cells were collected on D12 for endocrine cell generation (red arrows).

**(B)** Protocol for HIOs derived from hESCs. Endogenous NEUROG3 expression was not detected. To simulate endogenous NEUROG3 expression, NEUROG3<sup>WT</sup> was induced on D28 and organoids were collected on D35 for endocrine cell generation (red arrows).

**(C)** Schematic of tetracycline inducible NEUROG3 regulation with doxycycline treatment in pINDUCER20.

**(D)** Immunofluorescence analysis of NEUROG3 and NKX2-2 expression in pancreatic precursors derived from NEUROG3<sup>+/+</sup> (D7-D11), or NEUROG3<sup>wt</sup> hESCs.

**(E)** Immunofluorescence analysis of induced NEUROG3 temporal competency for pancreatic precursors. NEUROG3<sup>WT</sup> were induced on D6, D8, D9, or D10 and cells were collected on D12.

**(F)** Immunofluorescence analysis of NEUROG3 and NKX2-2 proteins in NEUROG3<sup>+/+</sup> (D9) and 100ng/ml 8-hour induced NEUROG3<sup>WT</sup> pancreatic precursors.

**(G)** Immunofluorescence analysis of NEUROG3 and ECAD of NEUROG3<sup>+/+</sup> (PD03 on D21 through D23) and 100ng/ml 8-hour induced NEUROG3<sup>WT</sup> 35-day HIOs.

**(H-I)** Quantification of NEUROG3 expression per cell **(H)** and NEUROG3<sup>+</sup> cell percentage **(I)** in NEUROG3<sup>+/+</sup> (D9-D11), or NEUROG3<sup>wt</sup> pancreatic precursors.

**(J)** Immunofluorescence analysis of NEUROG3 and ECAD expression in NEUROG3<sup>+/+</sup> (D28), NEUROG3<sup>+/+</sup> post-transplantation and 100ng/ml 8-hour induced NEUROG3<sup>WT</sup> HIOs.

For all experiments, the data is representative of a minimum of 2 separate experiments. Scale bar = 50, 100 and 300  $\mu$ m. Data are represented as mean  $\pm$  SD.

# Figure S2

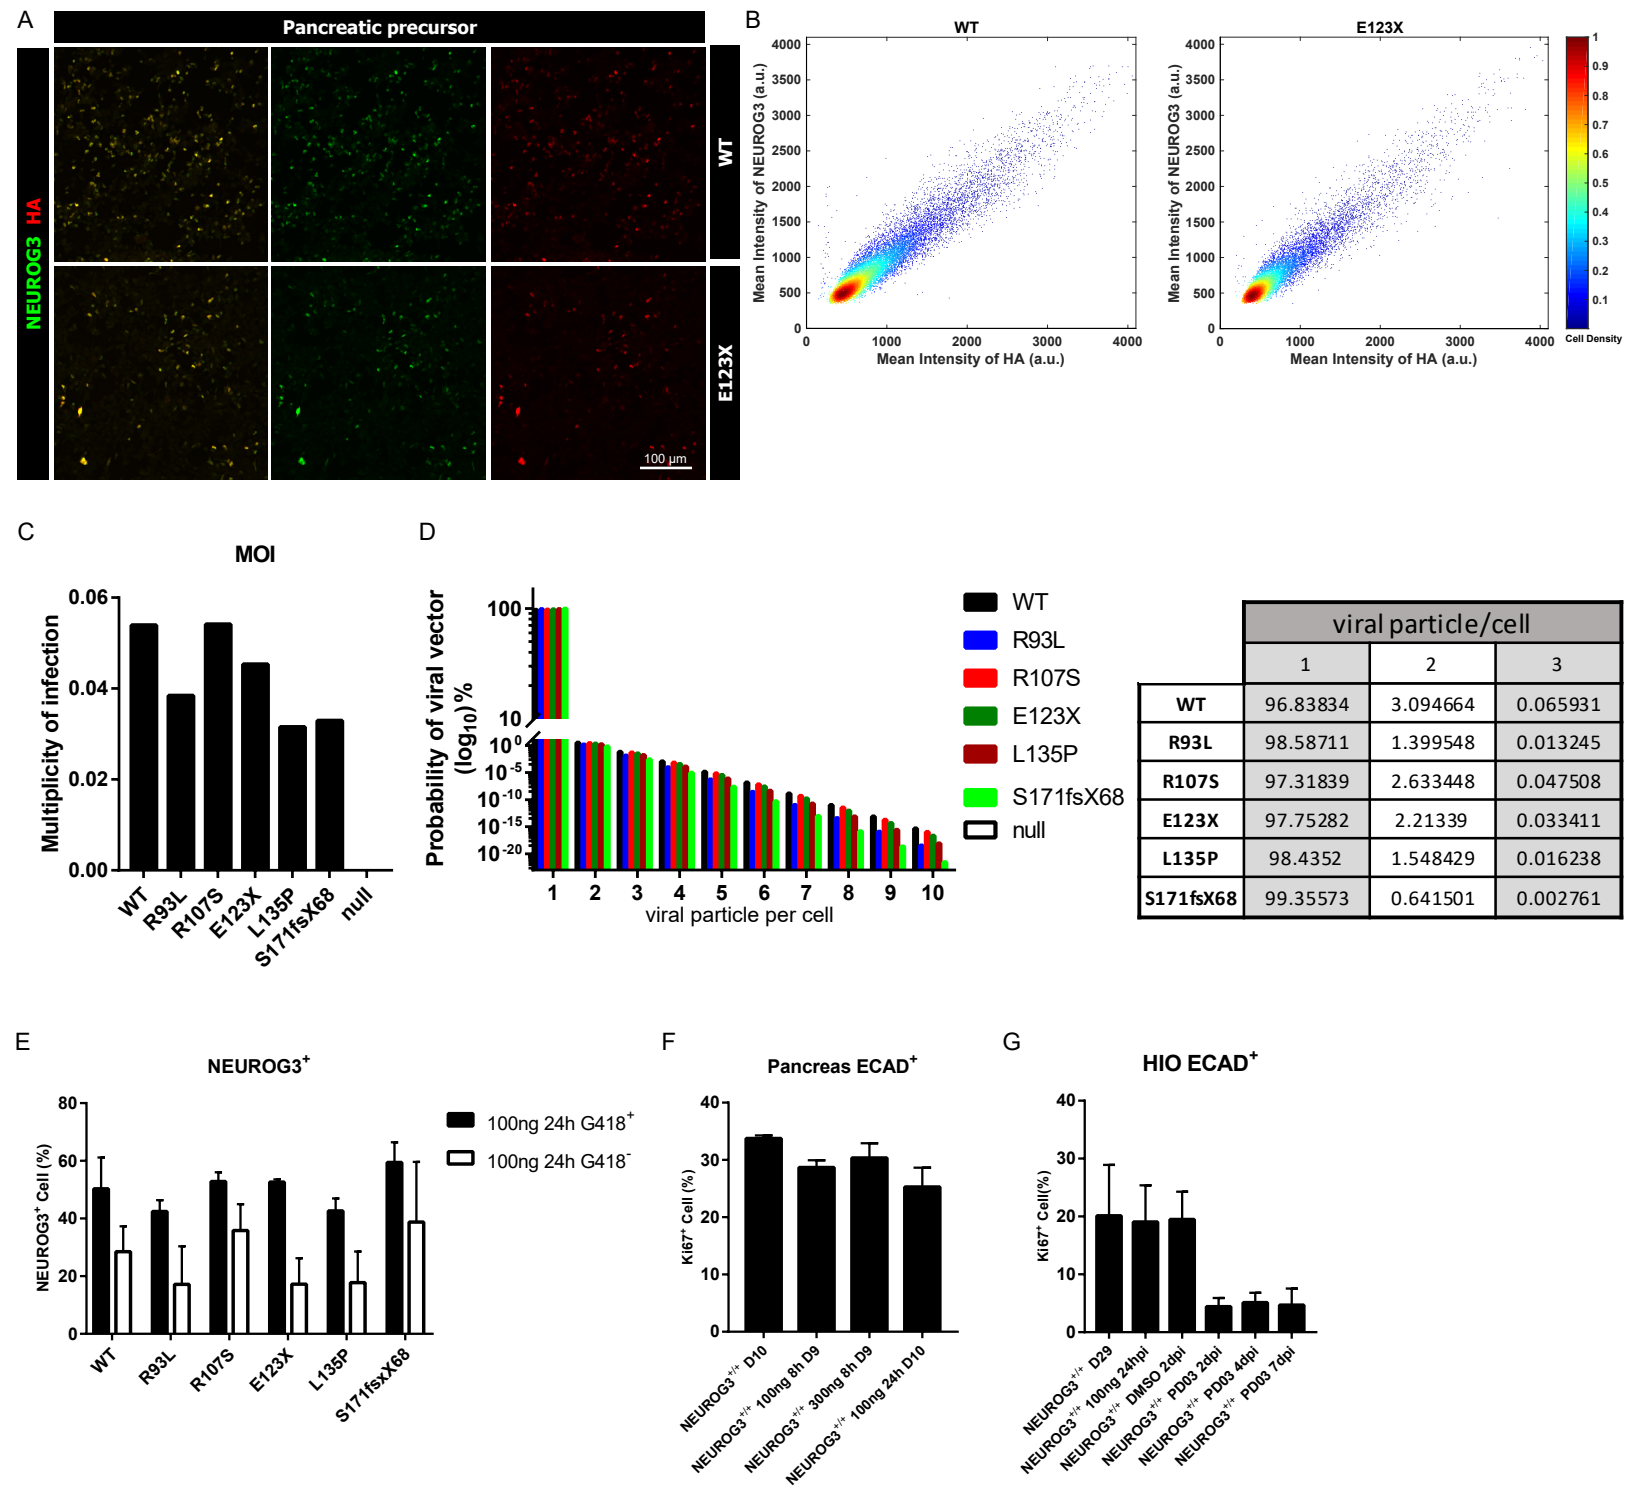

**Figure S2:** Doxycycline induction of NEUROG3 variants viral transfection mimics endogenous NEUROG3 expression level. Related to Figure 1.

**(A-B)** Immunofluorescence analysis **(A)** and quantification **(B)** of overlapping NEUROG3 and HA-tag of pancreatic precursors with 100ng/ml 8-hour and 24-hour induced NEUROG3 variants.

**(C-D)** Viral transduction multiplicity of infection (MOI) **(C)** and viral particle per cell probability **(D)** based on cell survival analysis post selection for all NEUROG3 variants.

**(E)** Evaluation of viral silencing effects on pancreatic precursors for all NEUROG3 variants based on NEUROG3<sup>+</sup> cell percentage post induction.

**(F)** Quantification of KI67 in NEUROG3<sup>+/+</sup> pancreatic precursors as evaluation of doxycycline effects on cell proliferation.

**(G)** Quantification of KI67 in NEUROG3<sup>+/+</sup> HIOs as evaluation of doxycycline and PD03 effects on cell proliferation.

For all experiments, the data is representative of a minimum of 2 separate experiments.

Scale bar = 100  $\mu$ m. Data are represented as mean  $\pm$  SD.



# Figure S3

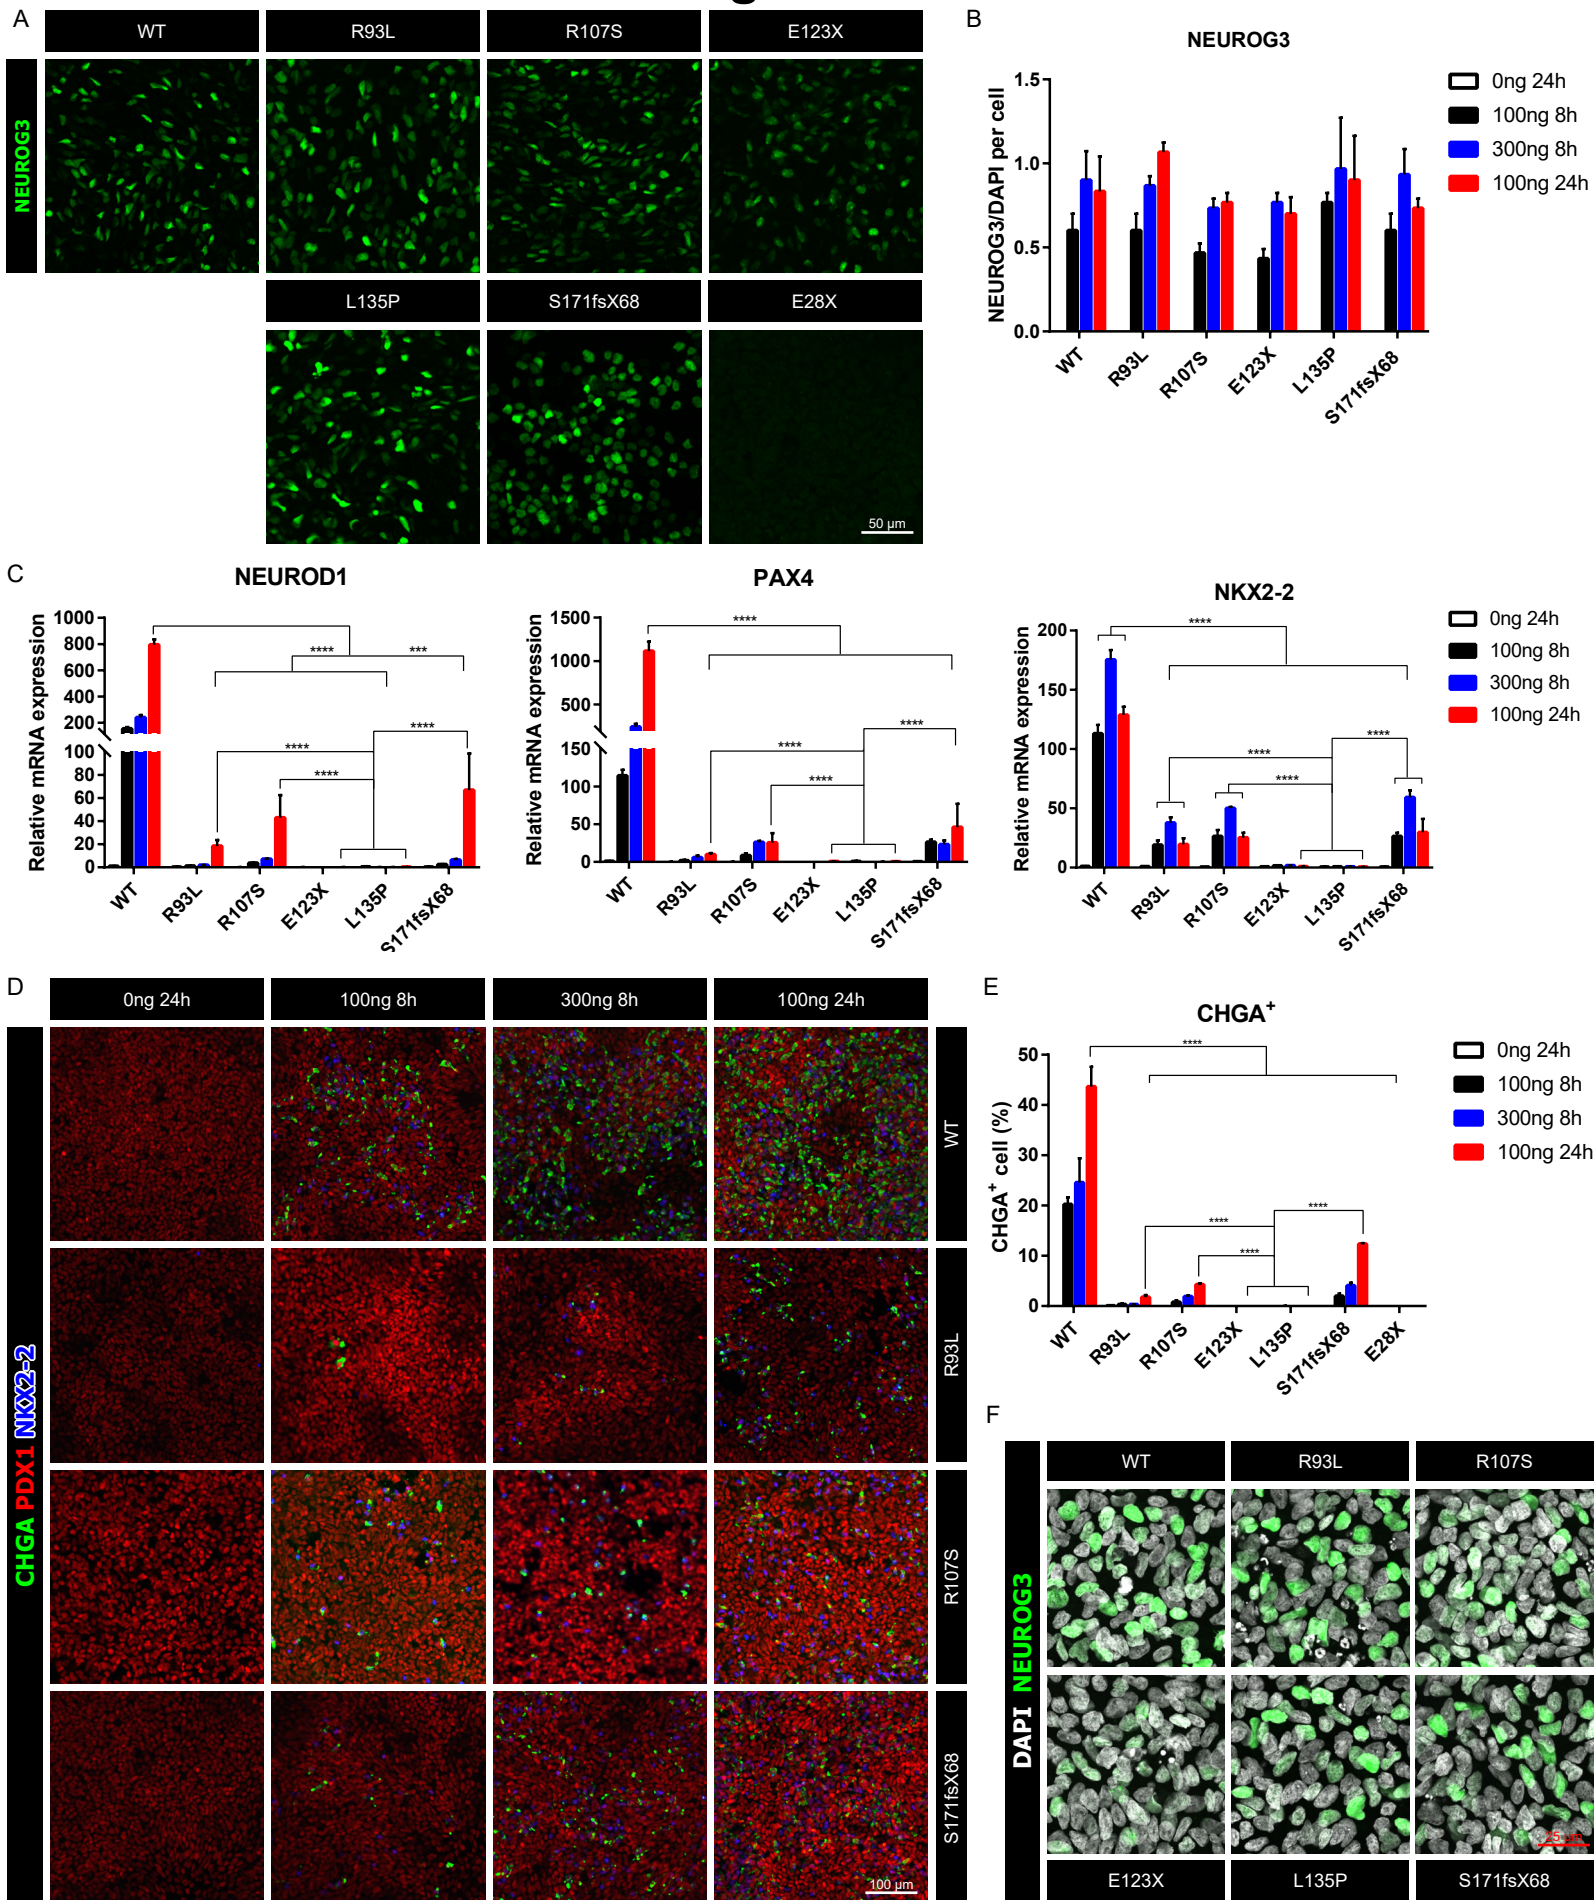

**Figure S3:** Overexpression of NEUROG3 variants in pancreatic precursors. Related to Figure 3.

**(A-B)** Immunofluorescence analysis **(A)** and quantification **(B)** of NEUROG3 with 100ng 8-hour induced NEUROG3 variants in pancreatic precursors.

**(C)** qPCR analysis of *NEUROD*, *PAX4*, and *NKX2-2* transcripts with 100, 300ng/ml 8-hour and 100ng/ml 24-hour induced NEUROG3 variants in pancreatic precursors.

**(D)** Immunofluorescence analysis of CHGA, PDX1 and NKX2-2 with 100, 300ng/ml 8-hour and 100ng/ml 24-hour induced NEUROG3 variants in pancreatic precursors.

**(E)** Quantification of CHGA<sup>+</sup> cell percentage of pancreatic endocrine with 100, 300ng/ml 8-hour and 100ng/ml 24-hour induced NEUROG3 variants.

**(F)** High magnification immunofluorescence analysis of DAPI NEUROG3 of pancreatic precursors with 100ng/ml 8-hour NEUROG3 variants.

For all experiments, the data is representative of a minimum of 3 separate experiments.

Scale bar = 25, 50 and 100  $\mu$ m. Data are represented as mean  $\pm$  SD. \* $p \leq 0.05$ , \*\* $p \leq 0.01$ , \*\*\* $p \leq 0.001$ , and \*\*\*\* $p \leq 0.0001$  for one-way ANOVA with Tukey HSD or Dunnett T3 (unequal variance) post hoc test.

# Figure S4

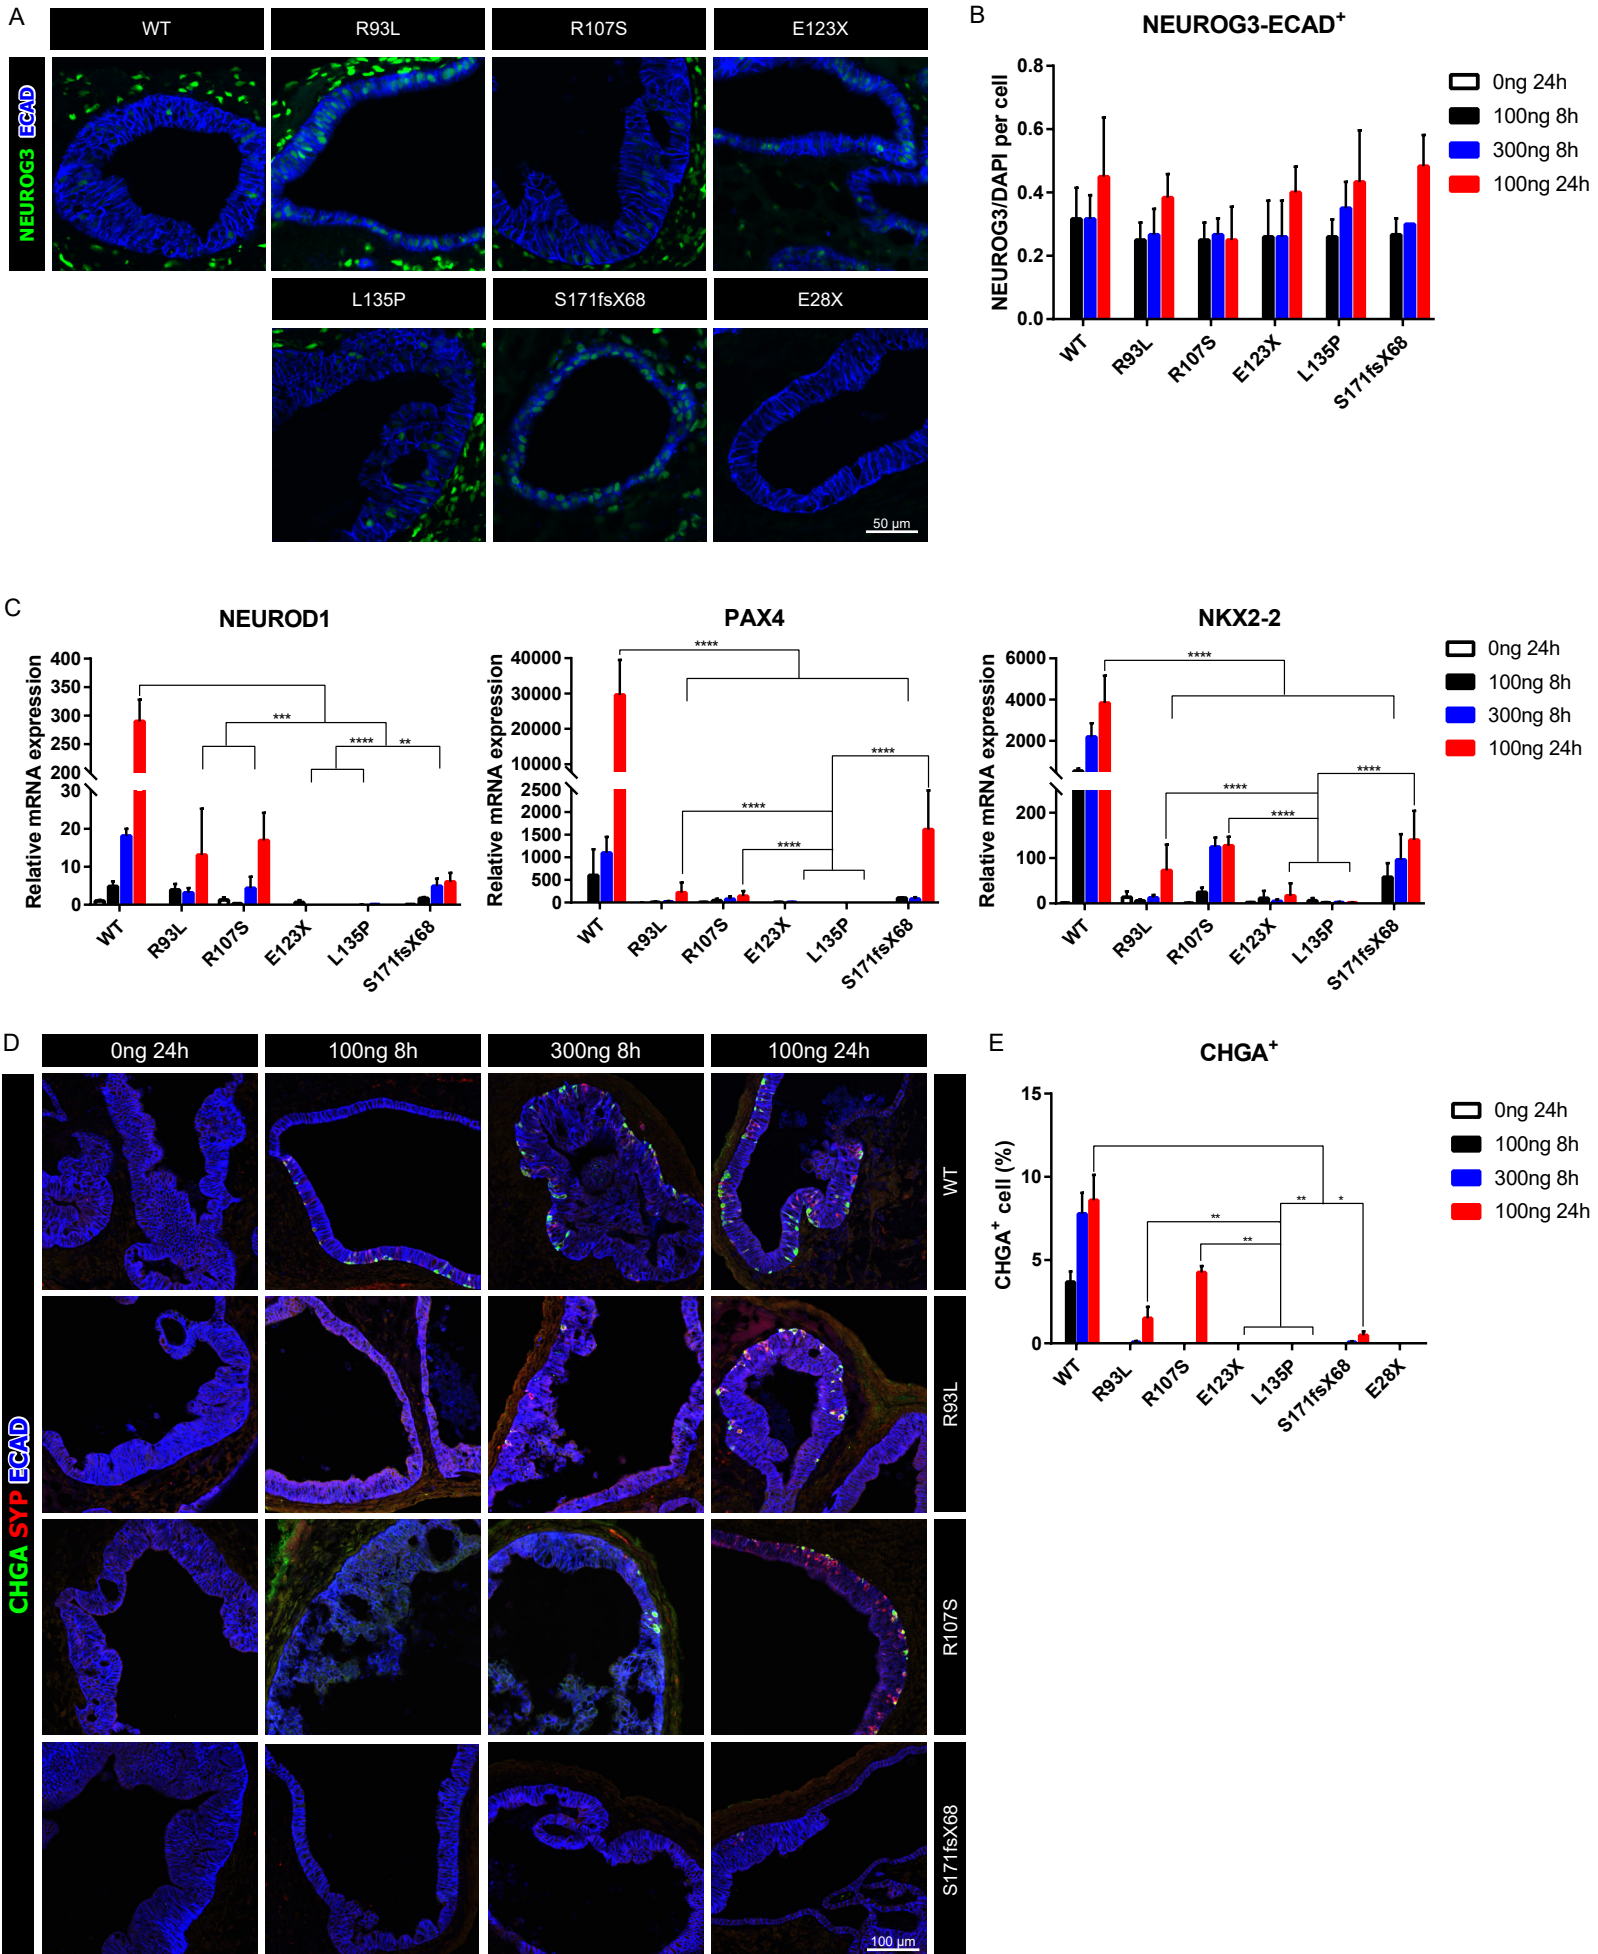

**Figure S4:** Overexpression of NEUROG3 variants in HIOs. Related to Figure 3.

**(A-B)** Immunofluorescence analysis **(A)** and quantification **(B)** of NEUROG3 (green) of HIOs with 100ng/ml 8-hour doxycycline induction of NEUROG3 variants derived from hESCs.

**(C)** qPCR analysis of *NEUROD*, *PAX4*, *NKX2-2* and *CHGA* transcripts in HIOs with 100, 300ng/ml 8-hour and 100ng/ml 24-hour induced NEUROG3 variants.

**(D)** Immunofluorescence analysis of CHGA (green), PDX1 (red) and ECAD (blue) of HIOs with 100, 300ng/ml 8-hour and 100ng/ml 24-hour induced NEUROG3 variants.

**(E)** Quantification of CHGA<sup>+</sup> cell percentage of HIOs with 100, 300ng/ml 8-hour and 100ng/ml 24-hour induced NEUROG3 derived from NEUROG3 variants.

For all experiments, the data is representative of a minimum of 3 separate experiments.

A minimum of 18 organoids were assessed. Scale bar = 50 and 100  $\mu$ m. Data are represented as mean  $\pm$  SD. \* $p \leq 0.05$ , \*\* $p \leq 0.01$ , \*\*\* $p \leq 0.001$ , and \*\*\*\* $p \leq 0.0001$  for one-way ANOVA with Tukey HSD or Dunnett T3 (unequal variance) post hoc test.



# Figure S5

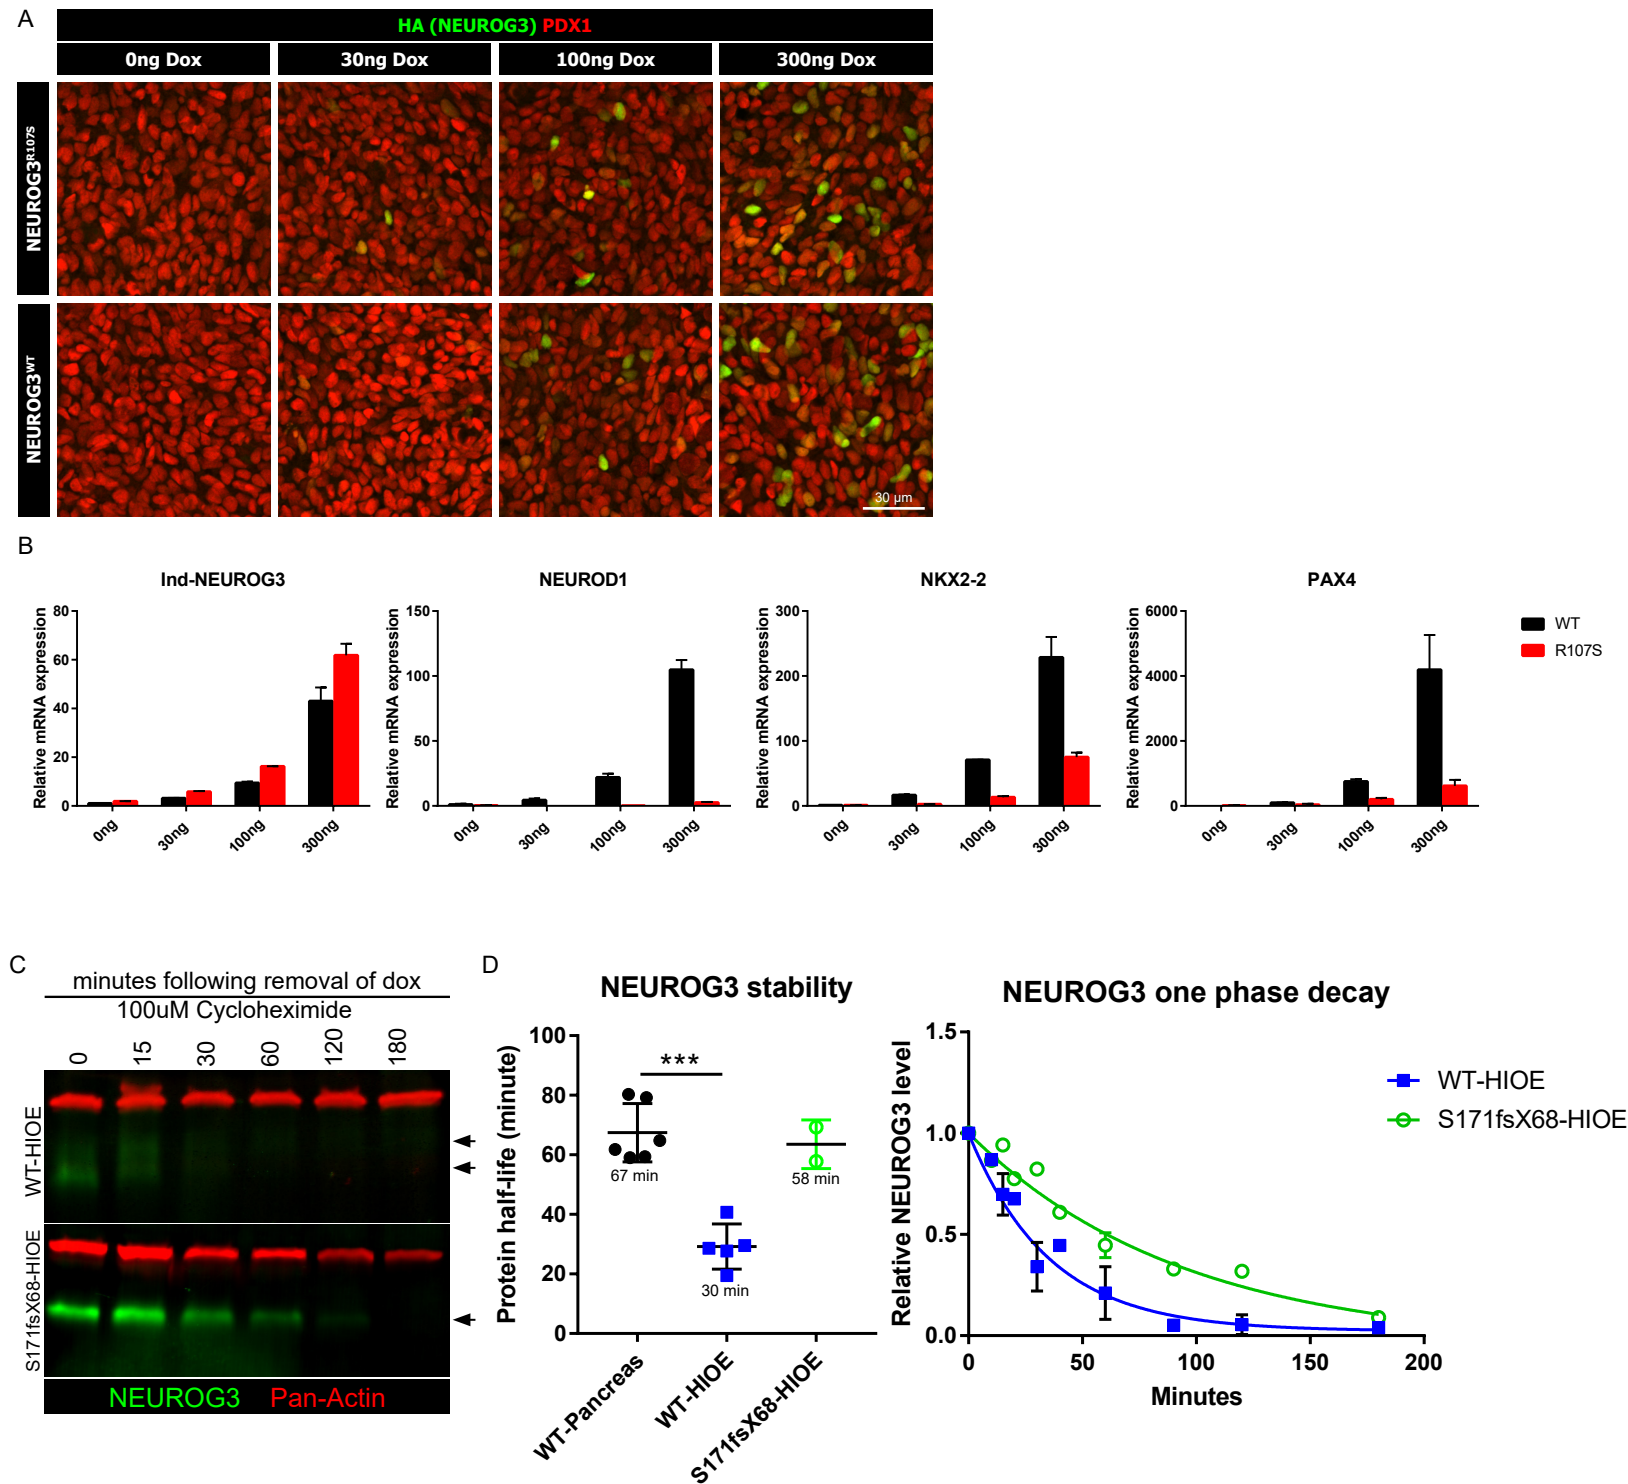

**Figure S5:** Overexpression of NEUROG3<sup>R107S</sup> to compensate reduced protein stability and NEUROG3 half-life comparison in pancreas precursors and HIOE. Related to Figure 4.

**(A)** Immunofluorescence analysis of NEUROG3 and PDX1 of pancreatic precursors with 0, 30, 100 or 300ng/ml 8-hour induced NEUROG3 variants.

**(B)** qPCR analysis of induced *NEUROG3*, *NEUROD*, *PAX4*, and *NKX2-2* transcripts in pancreatic precursors with 0, 30, 100 or 300ng/ml 8-hour induced NEUROG3 variants.

**(C)** Western blot analysis of NEUROG3 and ACTIN in human intestinal enteroids with 100ng/ml 24-hour induction of NEUROG3<sup>WT</sup> and NEUROG3<sup>S171fsX68</sup>. Arrows indicate multiple bands representing different forms of NEUROG3.

**(D)** Quantification of induced NEUROG3<sup>WT</sup> and NEUROG3<sup>S171fsX68</sup> half-life and corresponding decay curve in pancreatic precursors and human intestinal enteroids over the 180-minute time course using first order decay function. The data from NEUROG3<sup>WT</sup> in Figure 4G were shown again here for comparison. For stability assays each data point is a separate experiment and for the decay graph one representative experiment is shown. Scale bar = 30  $\mu$ m. Data are represented as mean  $\pm$  SD.



# Figure S6

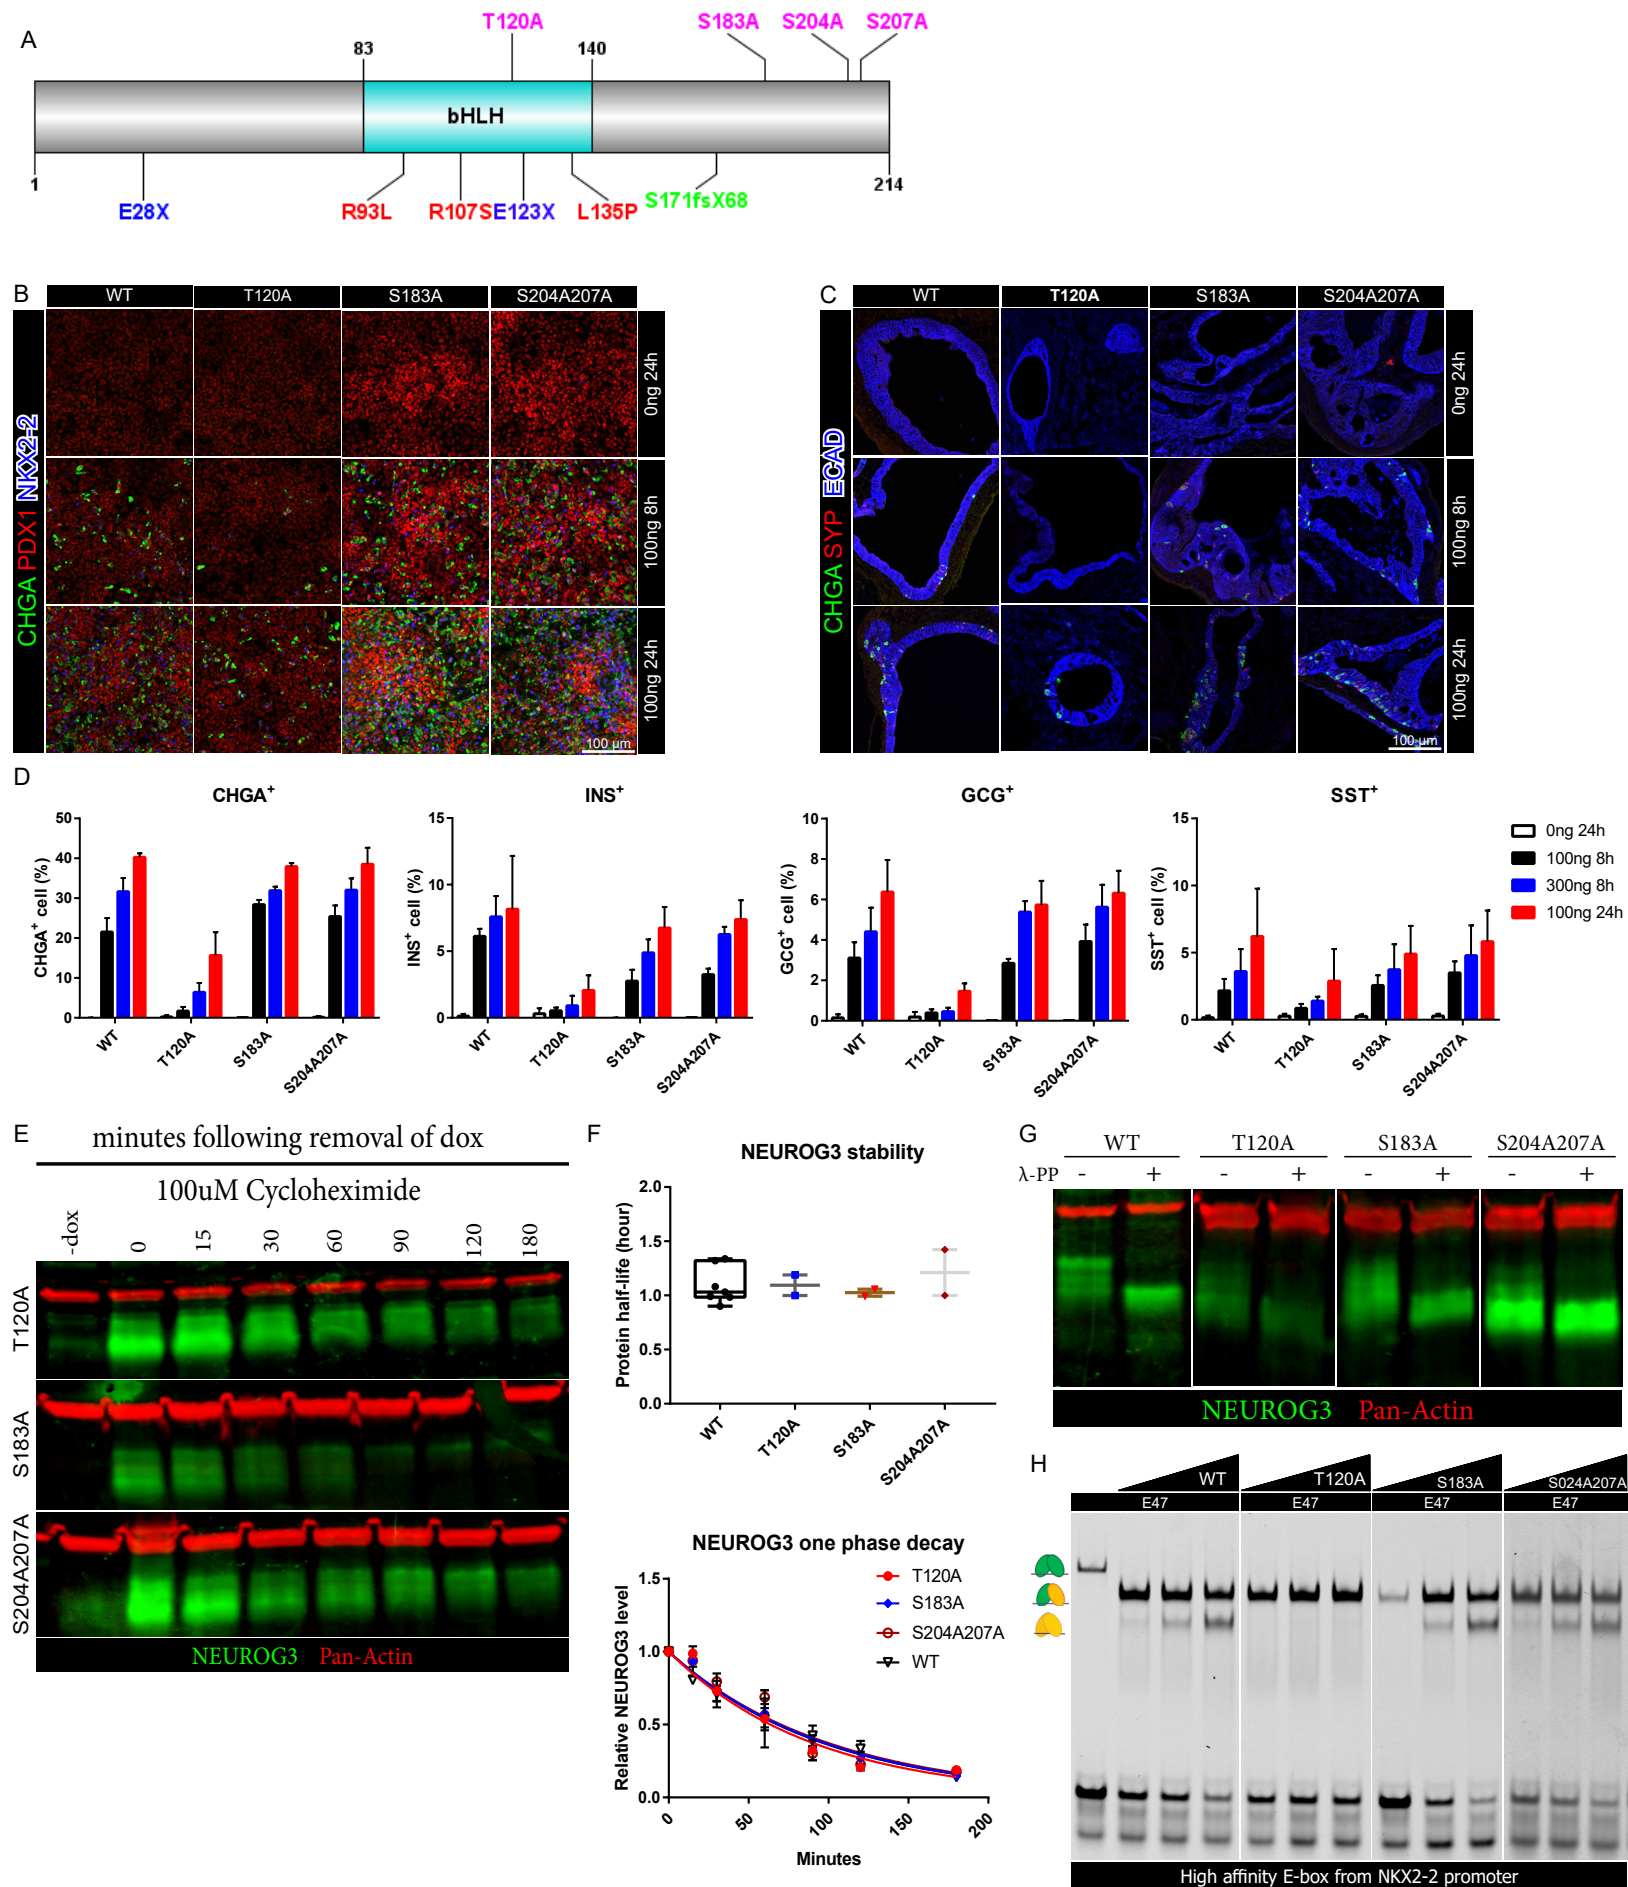

**Figure S6:** NEUROG3 T120, S183, S204, and S207 phosphorylation effects on endocrine development in hESCs derived pancreatic precursors and HIOs. Related to Figure 4.

**(A)** Schematic of NEUROG3 patient mutations (blue, red and green), predicted C-terminal phosphorylation sites (cyan), and phosphorylation mutations (magenta) mapped onto NEUROG3 structure.

**(B)** Immunofluorescence analysis of CHGA, PDX1 and NKX2-2 of pancreatic endocrine with 100ng/ml 8-hour and 24-hour induced NEUROG3 variants.

**(C)** Immunofluorescence analysis of CHGA (green), SYP (red) and ECAD (blue) of HIOs with 100ng/ml 8-hour and 24-hour induced NEUROG3 variants.

**(D)** Quantification of CHGA<sup>+</sup>, INS<sup>+</sup>, GCG<sup>+</sup> and SST<sup>+</sup> cells of pancreatic endocrine with 100ng/ml 8-hour and 24-hour induced NEUROG3 variants.

**(E)** Western blot analysis of NEUROG3 and ACTIN in pancreatic precursors with 100ng/ml 24-hour induced NEUROG3 variants.

**(F)** Quantification of induced NEUROG3 variants half-life and corresponding decay curve over the 180-minute time course in pancreatic precursors using first order decay function.

**(G)** Western blot analysis of NEUROG3 (green) and ACTIN (red) in pancreatic precursors with (+) or without (-) phosphatase λ-PP treatment.

**(H)** EMSA analysis of purified NEUROG3 variants binding activity to high affinity E-box, in the form of NEUROG3-E47 heterodimer and NEUROG3-NEUROG3 homodimer.

For all experiments, the data is representative of a minimum of 2 separate experiments. A minimum of 10 organoids were assessed. Scale bar = 100 μm. Data are represented as mean ± SD.

# Figure S7

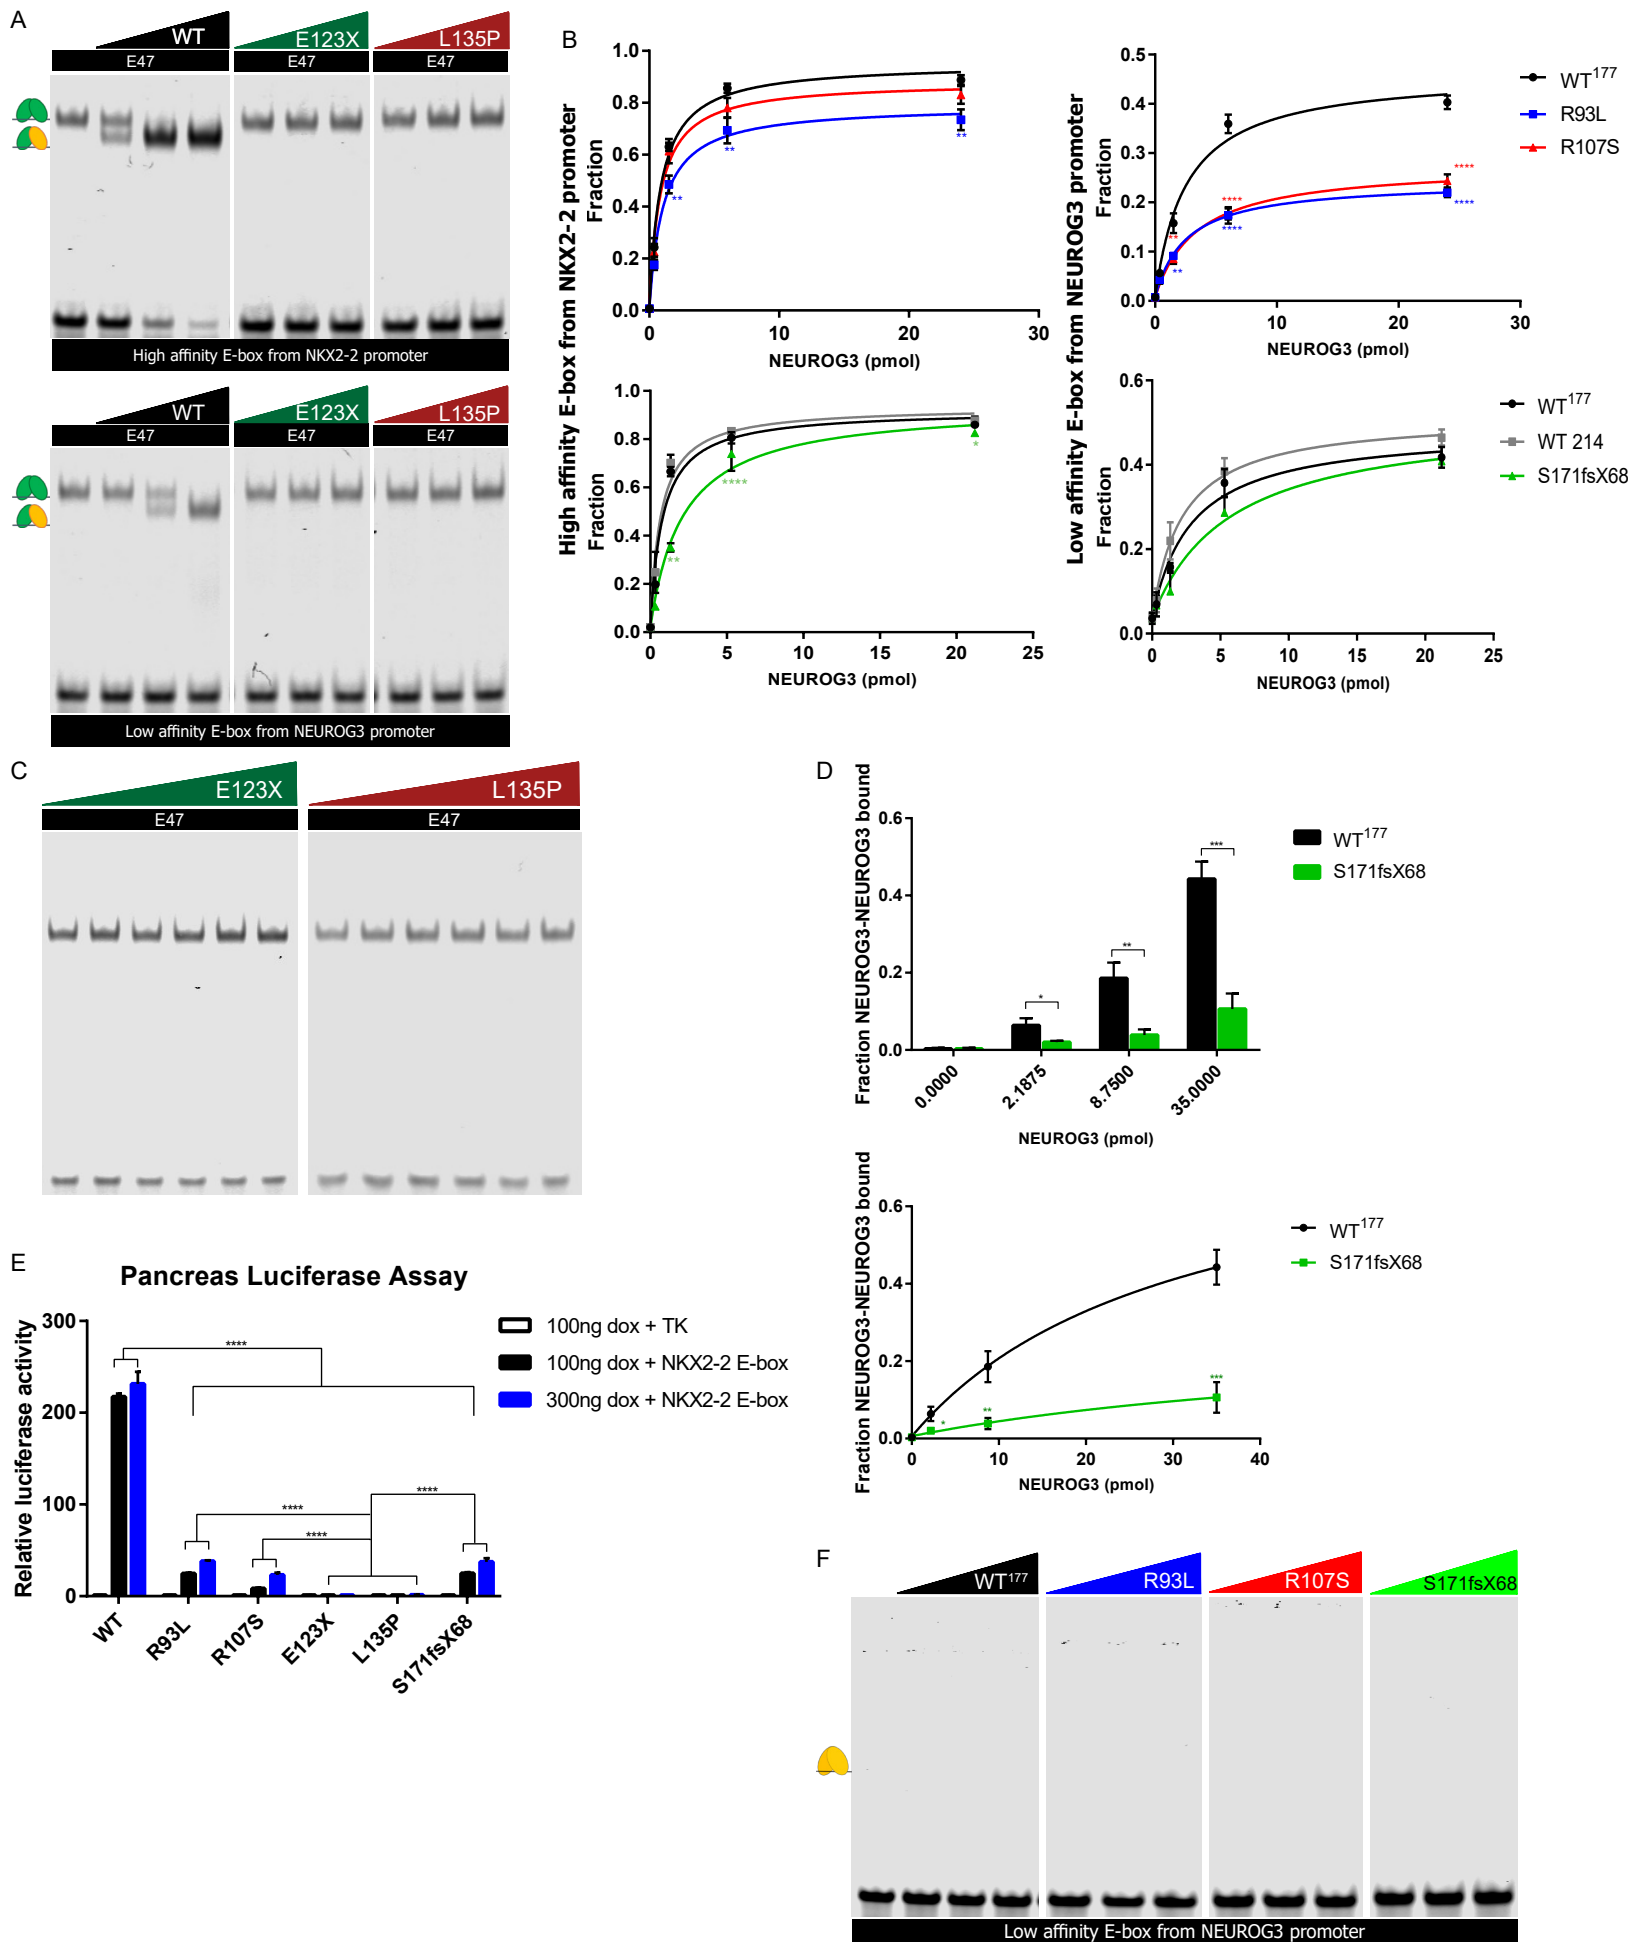

**Figure S7:** Defective E-box binding affinity of NEUROG3 mutations. Related to Figure 5 and Figure 6.

**(A)** EMSA analysis of purified NEUROG3 variants heterodimer binding activity to high affinity and low affinity E-box.

**(B)** Quantification of high affinity and low affinity E-box fraction bound with purified NEUROG3 variants.

**(C)** EMSA analysis of purified NEUROG3 variants heterodimer binding activity to high affinity E-box.

**(D)** Quantification of purified NEUROG3 variants homodimer binding activity to high affinity E-box.

**(E)** Luciferase analysis of *NKX2-2* high affinity E-box promoter activation in pancreatic precursors with 100ng 8-hour, and 300ng-8h doxycycline induction of NEUROG3 variants derived from hESCs.

**(F)** EMSA analysis of purified NEUROG3 variants homodimer binding activity to low affinity E-box.

For all experiments, the data is representative of a minimum of 3 separate experiments.

Data are represented as mean  $\pm$  SD. \* $p \leq 0.05$ , \*\* $p \leq 0.01$ , \*\*\* $p \leq 0.001$ , and \*\*\*\* $p \leq 0.0001$  for two-tailed student's t-test or one-way ANOVA with Tukey HSD or Dunnett T3 (unequal variance) post hoc test.

**Table S1**

| <b>NEUROG3 Mutation</b> | <b>Malabsorptive Diarrhea</b> | <b>Diabetes Onset</b>                                        | <b>Reference</b>                                |
|-------------------------|-------------------------------|--------------------------------------------------------------|-------------------------------------------------|
| R93L/R93L               | Yes                           | Patient 1: 8 yrs<br>Patient 2: 8 yrs                         | Wang et al., 2006                               |
| E123X/E123X             | Yes                           | Patient 1: 5 mos                                             | Pinney et al, 2011                              |
| R107S/R107S             | Yes                           | Patient 1: 12 yrs<br>Patient 2: >23 yrs<br>Patient 3: >2 yrs | Rubio-Cabezas et al., 2014<br>Wang et al., 2006 |
| L135P/L135P             | Yes                           | Patient 1: 3 wks<br>Patient 2: 13 yrs                        | Rubio-Cabezas et al., 2014                      |
| E28X/L135P              | Yes                           | Patient 2: 13 yrs                                            | Rubio-Cabezas et al., 2011                      |
| S171fsX68/S171fsX68     | Yes                           | Patient 1: >20 mos                                           | Sayar et al., 2013                              |
| Q4X/Q4X                 | Yes                           | Patient 1: 2 mos<br>Patient 2: 13 days                       | Hancili et al., 2017                            |

**Table S1:** Reported NEUROG3 mutations and related patient phenotypes.



**Table S2**

| <b>NEUROG3<br/>Mutation</b> | <b>Protein Stability</b> |          | <b>DNA binding</b> |          | <b>Biological Activity</b> |          |
|-----------------------------|--------------------------|----------|--------------------|----------|----------------------------|----------|
|                             | Current                  | Previous | Current            | Previous | Current                    | Previous |
| WT                          | +++                      | +++      | +++                | +++      | +++                        | +++      |
| T120A                       | +++                      | +        | ++                 | ++       | +                          | +++      |
| S183A                       | +++                      | ++++     | +++                | /        | +++                        | ++++     |
| S204A207A                   | +++                      | /        | +++                | /        | +++                        | -        |

**Table S2:** Comparison of current NEUROG3 phosphorylation mutation effects with previous reports.
